# Supplementary material for: Anticoagulant Property of a Sulfated Polysaccharide with Unique Structural Characteristics from the Green Alga Chaetomorpha aerea
Source: MDPI journal article supplement (doi:10.3390/md21020088), 2023-01-26
Supplement: s1 [file s1]

**Supplementary material for:**

**Anticoagulant Property of a Sulfated Polysaccharide with  
Unique Structural Characteristics from the Green Alga  
*Chaetomorpha aerea***

**Ling Qin<sup>1</sup>, Yajing Yang<sup>1</sup>, Wenjun Mao<sup>1,2,\*</sup>**

<sup>1</sup> Key Laboratory of Marine Drugs of Ministry of Education, Shandong Provincial Key Laboratory of Glycoscience and Glycotechnology, School of Medicine and Pharmacy, Ocean University of China, Qingdao 266003, China

<sup>2</sup> Laboratory for Marine Drugs and Bioproducts, National Laboratory for Marine Science and Technology (Qingdao), Qingdao 266237, China

\* Correspondence: wenjunm@ouc.edu.cn; Tel.: +86-532-8203-1560

## SUPPLEMENTARY FIGURES

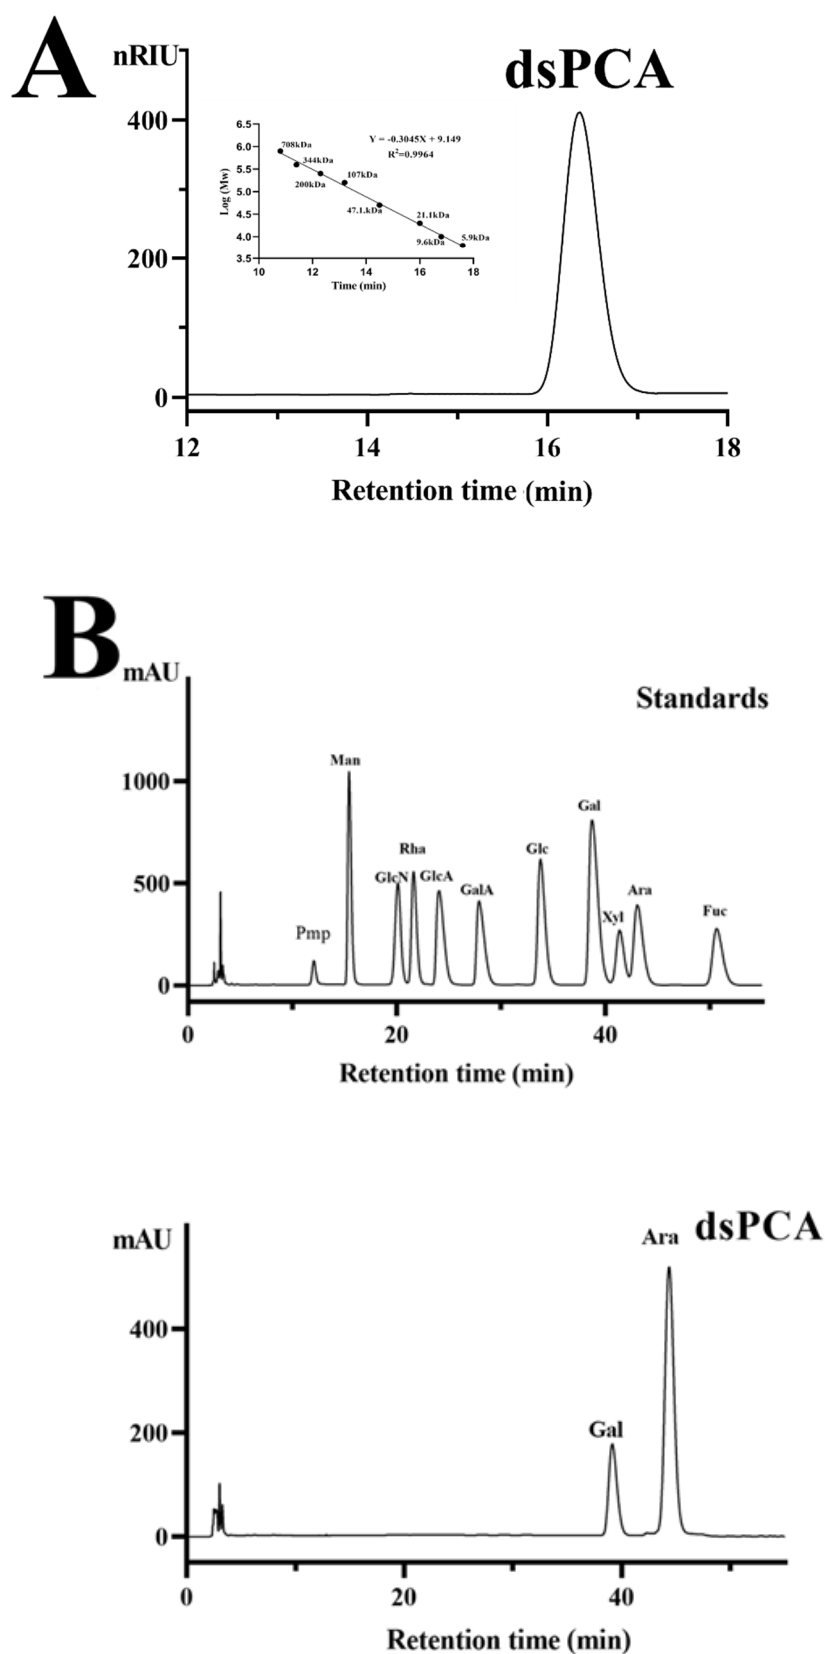

**Figure S1.** HPGPC and HPLC chromatograms of dsPCA. **(A)** HPGPC chromatogram of dsPCA on a Shodex OHpak SB-804 HQ column and the standard curve of molecular weight; **(B)** HPLC chromatogram for monosaccharide component analysis of dsPCA (Man: D-mannose, GlcN: D-glucosamine, Rha: L-rhamnose, GlcA: D-glucuronic acid, GalA: D-galacturonic acid, Glc: D-glucose, Gal: D-galactose, Xyl: D-xylose, Ara: L-

arabinose, Fuc: L-fucose).

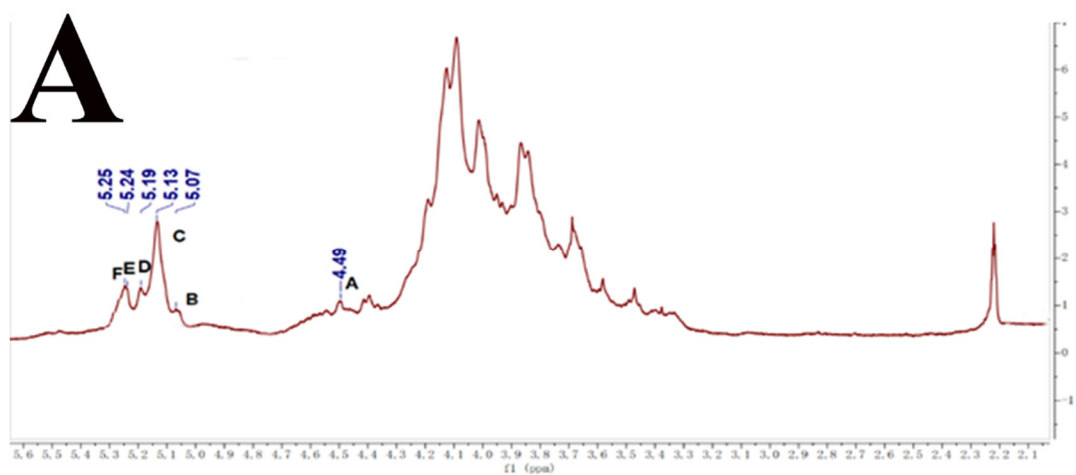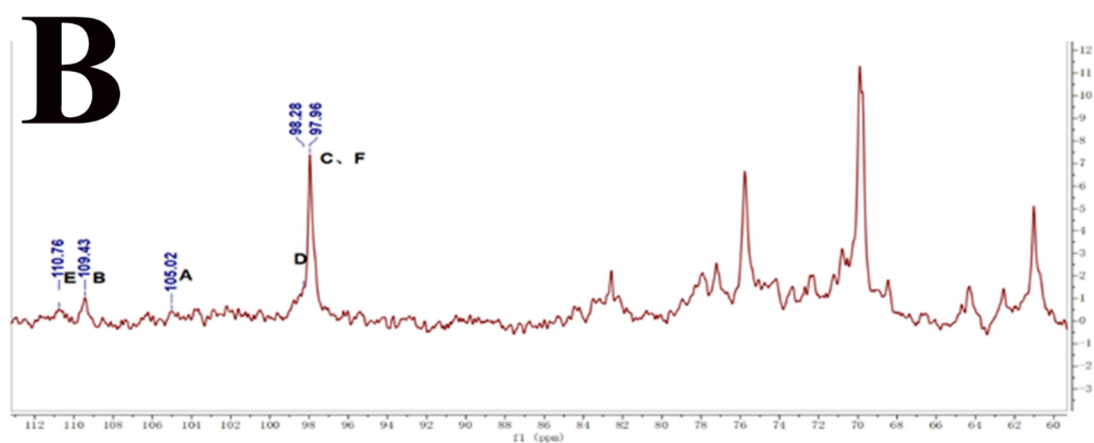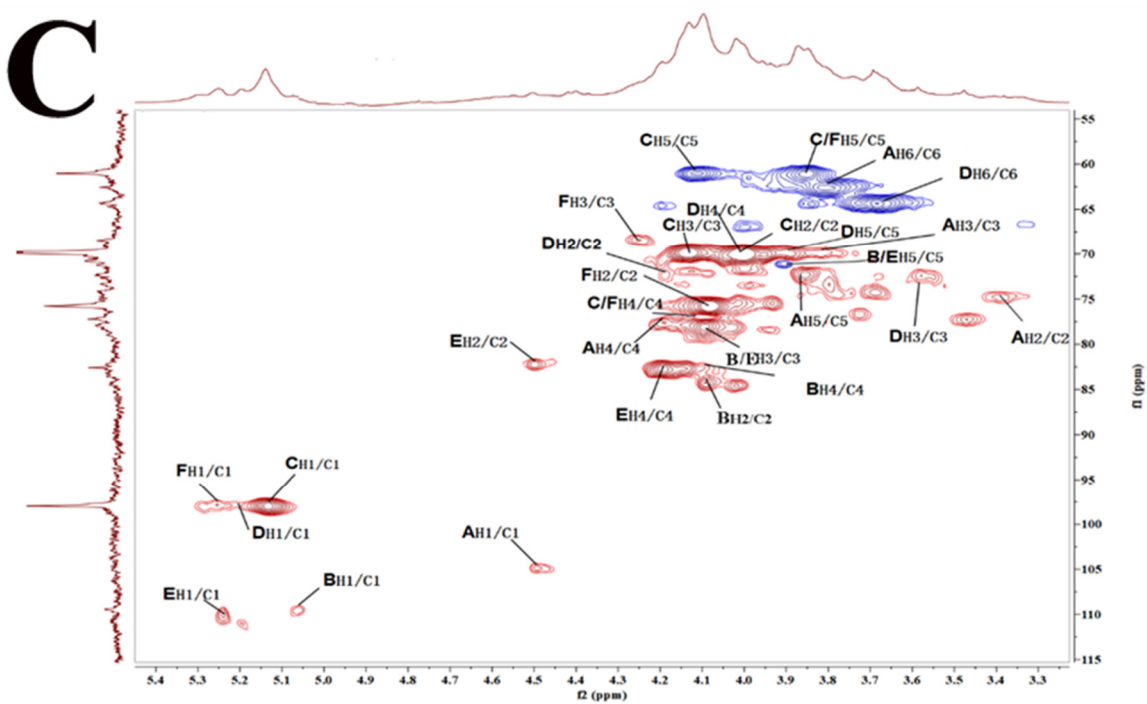

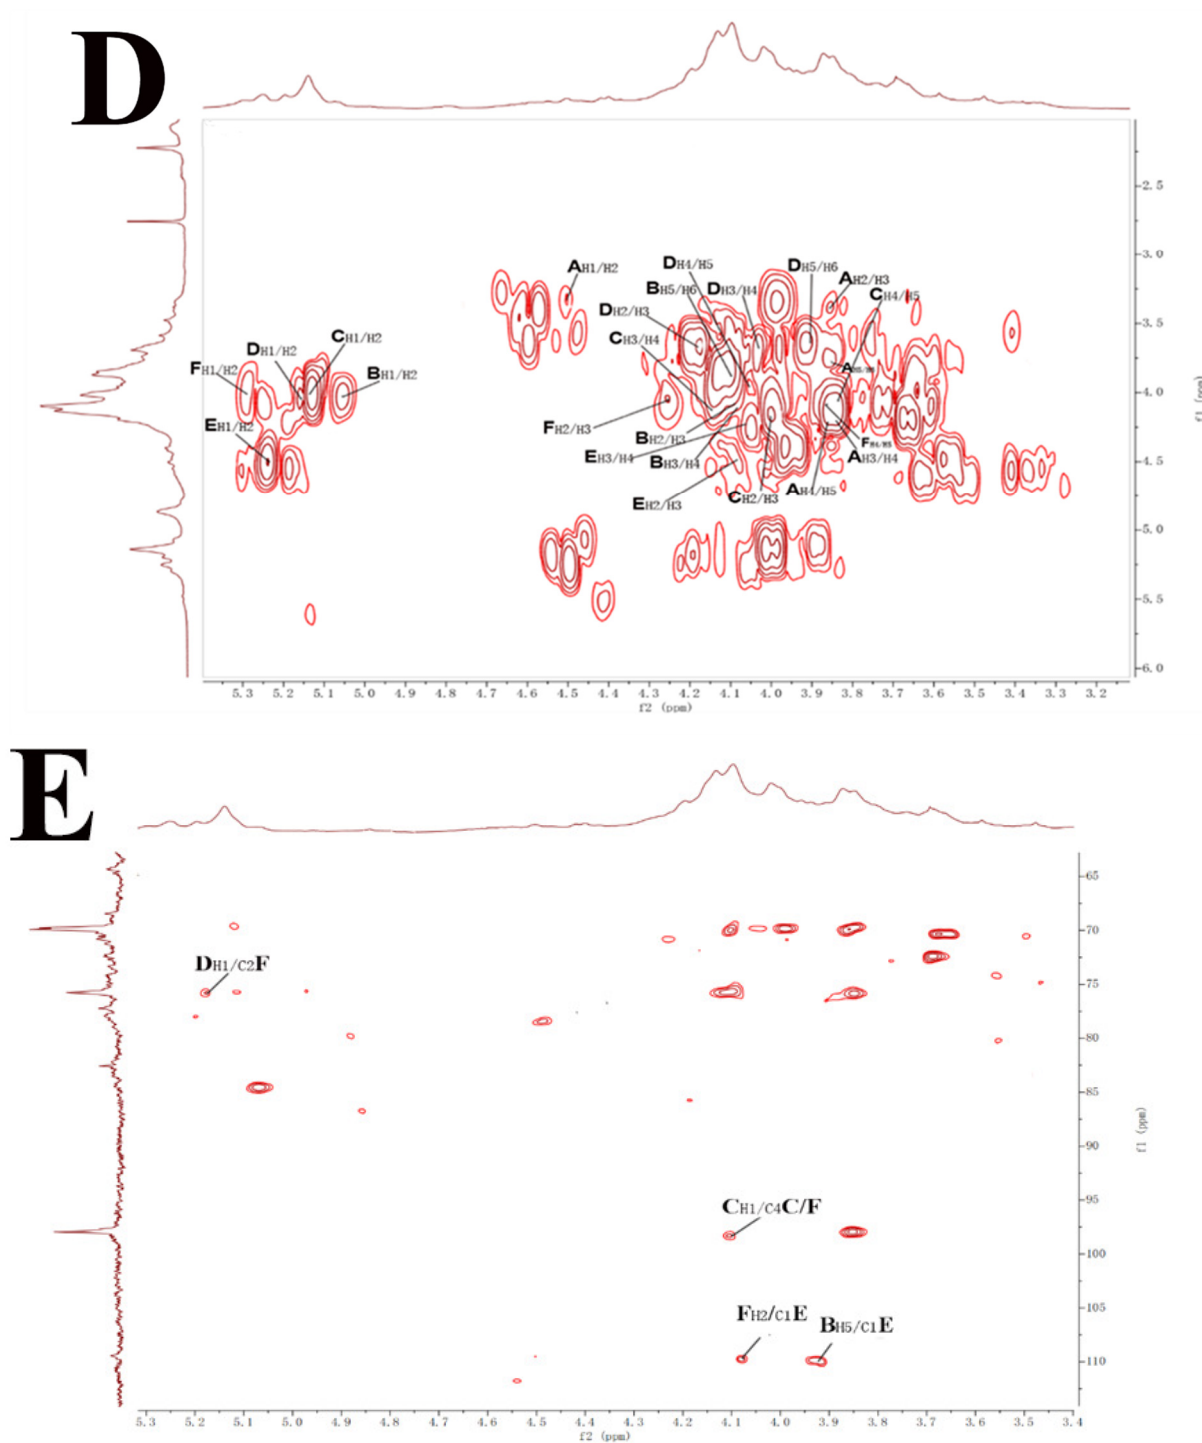

**Figure S2.** NMR spectra of dsPCA. Spectra were performed on an Agilent DD2 500 MHz NMR spectrometer using acetone as internal standard. **(A)**  $^1\text{H}$  NMR spectrum; **(B)**  $^{13}\text{C}$  NMR spectrum; **(C)**  $^1\text{H}$ - $^1\text{H}$  COSY spectrum; **(D)**  $^1\text{H}$ - $^{13}\text{C}$  HSQC spectrum; **(E)**  $^1\text{H}$ - $^{13}\text{C}$  HMBC spectrum. A:  $\rightarrow 4$ )- $\beta$ -D-Galp-(1  $\rightarrow$  ; B:  $\rightarrow 2,5$ )- $\alpha$ -L-Araf-(1  $\rightarrow$  ; C:  $\rightarrow 4$ )- $\beta$ -L-Arap-(1  $\rightarrow$  ; D:  $\rightarrow 6$ )- $\alpha$ -D-Galp-(1  $\rightarrow$  ; E:  $\rightarrow 5$ )- $\alpha$ -L-Araf-(1  $\rightarrow$  ; F:  $\rightarrow 2,4$ )- $\beta$ -L-Arap-(1  $\rightarrow$  Galp: galactopyranos, Araf: arabinofuranose, Arap: arabinopyranos.
